# Supplementary material for: Marijuana use and repeated attempted suicide among senior high school students in Ghana: Evidence from the WHO Global School-Based Student Health Survey, 2012
Source: HighWire-hosted journal article supplement (doi:10.1136/gpsych-2020-100311), 2020-11-01
Supplement: gpsych-2020-100311supp001_data_supplement.pdf [file gpsych-2020-100311supp001_data_supplement.pdf]

**Supplementary Table 1: Detailed variable definition, type of variable, measurement, and scale of measurement**

| Variable                   | Type of variable                 | Description                                                                                                                 | Measurement                                                                                | Scale of measurement | Number of observations/Missing |
|----------------------------|----------------------------------|-----------------------------------------------------------------------------------------------------------------------------|--------------------------------------------------------------------------------------------|----------------------|--------------------------------|
| Marijuana use              | 1st outcome variable             | During the past 30 days, how many times have you used marijuana (also called wee, Jah, indian hemp, ahabammono, and ganja)? | Recategorized as Yes=1 (1 or 2 times, 3-9 times, 10-19 times and 20+ times) or No (0 time) | Artificial binary    | 1931/53                        |
| Suicidal ideation          | Suicide domain                   | During the past 12 months, did you ever seriously consider attempting suicide?                                              | Yes=1 or No=0                                                                              | Binary               | 1975/9                         |
| Suicidal planning          | Suicide domain                   | During the past 12 months, did you make a plan about how you would attempt suicide?                                         | Yes=1 or No=0                                                                              | Binary               | 1950/34                        |
| Repeated suicidal attempts | 2 <sup>nd</sup> outcome variable | During the past 12 months, how many times did you actually attempt suicide?                                                 | Recategorized as No=0 (0 and 1 time) and Yes=1 (2-6+ times)                                | Artificial binary    | 1969/15                        |
| Age of participant         | Covariate                        | Participant age group                                                                                                       | Recoded as $\leq 17$ and 18+ years                                                         | Binary               | 1977/7                         |
| Grade                      | Covariate                        | In what grade are you?                                                                                                      | Recategorized as SHS 1, SHS 2, SHS 3 or SHS 4                                              | Categorical          | 1976/8                         |
| Experience of hunger       | Covariate                        | During the past 30 days, how often did you go hungry because there was not enough food in your home?                        | Recategorized as No=0 (never) and Yes=1 (rarely, sometimes, most of the time or always)    | Artificial binary    | 1981/3                         |
| Bullying victimization     | Covariate                        | During the past 30 days, on how many days were you bullied?                                                                 | Recategorized as No=0 (0 day) and Yes=1 (1-30 days)                                        | Artificial binary    | 1839/145                       |
| Experience insomnia        | Covariate                        | During the past 12 months, how often have you been so worried about something that you could not sleep at night?            | Recategorized as No=0 (never) and Yes=1 (rarely, sometimes, most of the time or always)    | Artificial binary    | 1980/4                         |

|                              |           |                                                                                                          |                                                                                                                         |                   |          |
|------------------------------|-----------|----------------------------------------------------------------------------------------------------------|-------------------------------------------------------------------------------------------------------------------------|-------------------|----------|
| Close friends                | Covariate | How many close friends do you have?                                                                      | None, 1 friend, 2 friends or 3+ friends                                                                                 | Categorical       | 1968/16  |
| Weekly smoking exposure      | Covariate | During the past 7 days, on how many days have people smoked in your presence?                            | Recategorized as Never, 1-2 days or 3+ days                                                                             | Categorical       | 1979/5   |
| Parent smoker                | Covariate | Which of your parents or guardians use any form of tobacco?                                              | Recategorized as No=0 (neither or do not know) or Yes=1 (my father or male guardian, my mother female guardian or both) | Artificial binary | 1976/8   |
| Alcohol intake               | Covariate | During the past 30 days, on how many days did you have at least one drink containing alcohol?            | Recategorized as None=0 (0 day) and Yes=1 (1-30 days)                                                                   | Artificial binary | 1863/121 |
| Truancy                      | Covariate | During the past 30 days, on how many days did you miss classes or school without permission?             | Recategorized as No=0 (0 day) and Yes=1 (1-10+ days)                                                                    | Artificial binary | 1960/24  |
| Social support at school     | Covariate | During the past 30 days, how often were most of the students in your school kind and helpful?            | Recategorized as No=0 (never) and Yes=1 (rarely, sometimes, most of the time or always)                                 | Artificial binary | 1958/26  |
| Experience loneliness        | Covariate | During the past 12 months, how often have you felt lonely?                                               | Recategorized as No=0 (never) and Yes=1 (rarely, sometimes, most of the time or always)                                 | Artificial binary | 1979/5   |
| Homework checking by Parents | Covariate | During the past 30 days, how often did your parents or guardians check to see if your homework was done? | Recategorized as No=0 (never) and Yes=1 (rarely, sometimes, most of the time or always)                                 | Artificial binary | 1944/40  |
| Engaging on physical fights  | Covariate | During the past 12 months, how many times were you in a physical fight?                                  | Recategorized as No=0 (0 time) and Yes=1 (1-12+ times)                                                                  | Artificial binary | 1976/8   |
